# Supplementary material for: An interpenetrating amine-functionalized metal–organic framework as an efficient and reusable catalyst for the selective synthesis of tetrahydro-chromenes
Source: Royal Society of Chemistry journal article supplement (doi:10.1039/c4ce02141j), 2015-01-01
Supplement: c4ce02141j1.pdf [file c4ce02141j1.pdf]

## **Electronic Supplementary Information for MS:**

### **Interpenetrating amine-functionalized metal-organic framework as an efficient and reusable catalyst for selective synthesis of tetrahydro-chromenes**

V. Safarifard,<sup>‡</sup> S. Beheshti,<sup>‡</sup> and A. Morsali<sup>\*</sup>

Department of Chemistry, Faculty of Sciences, Tarbiat Modares University, P.O. Box 14115-175, Tehran, Islamic Republic of Iran

Email; morsali\_a@modares.ac.ir

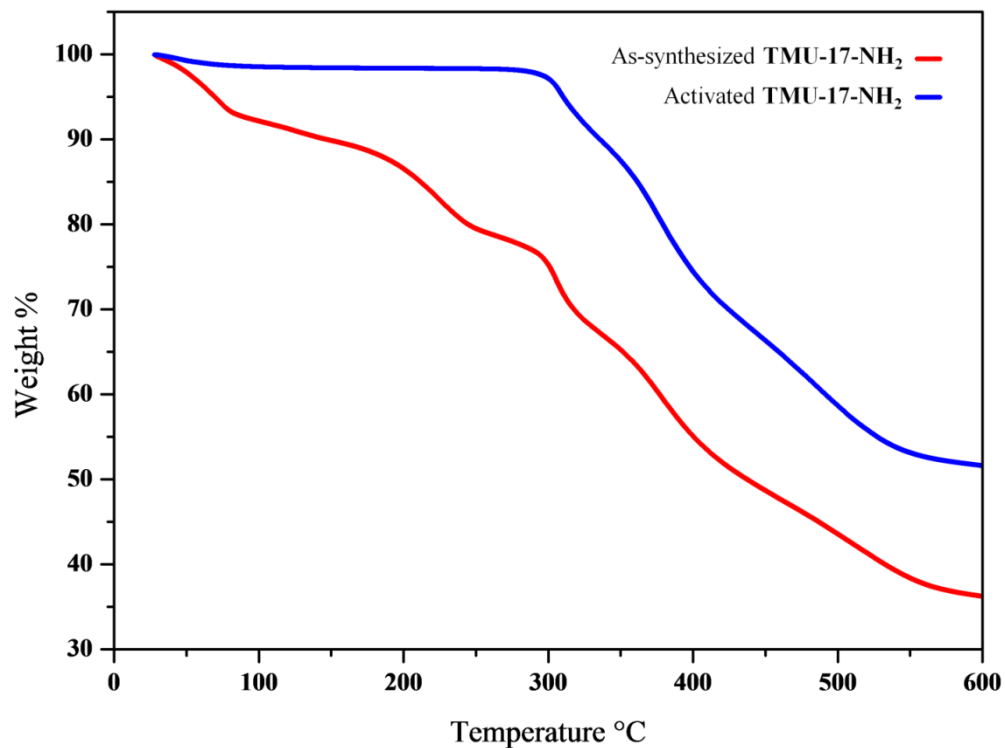

Fig. S1 TGA curves of as-synthesized (red) and activated (blue) TMU-17-NH<sub>2</sub>.

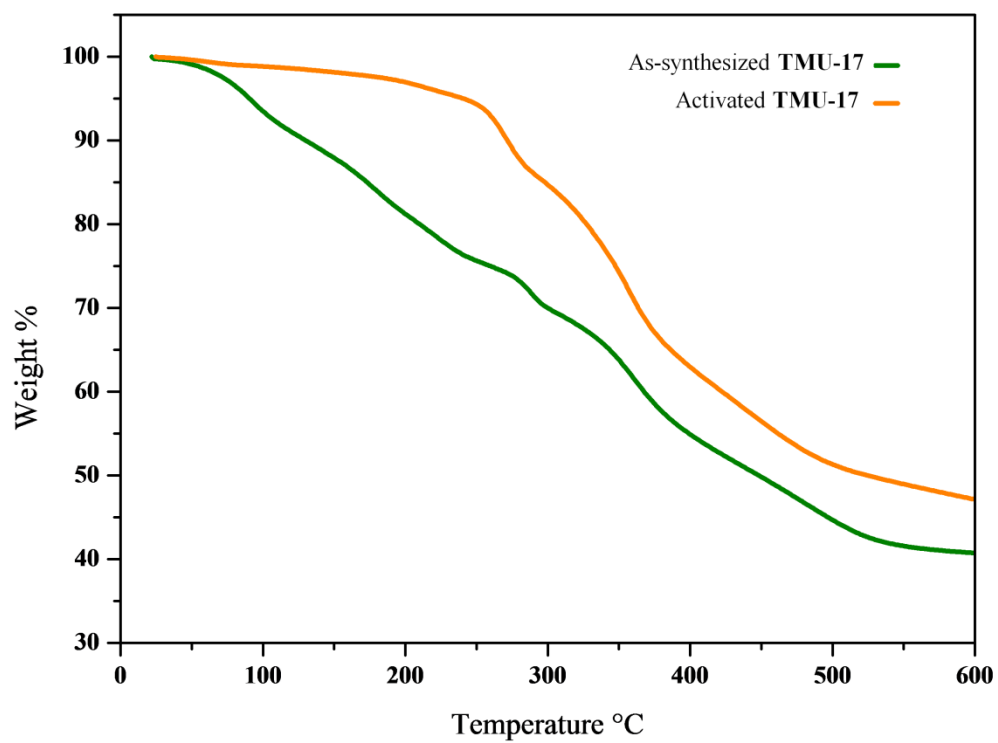

Fig. S2 TGA curve of as-synthesized (green) and activated (orange) TMU-17.

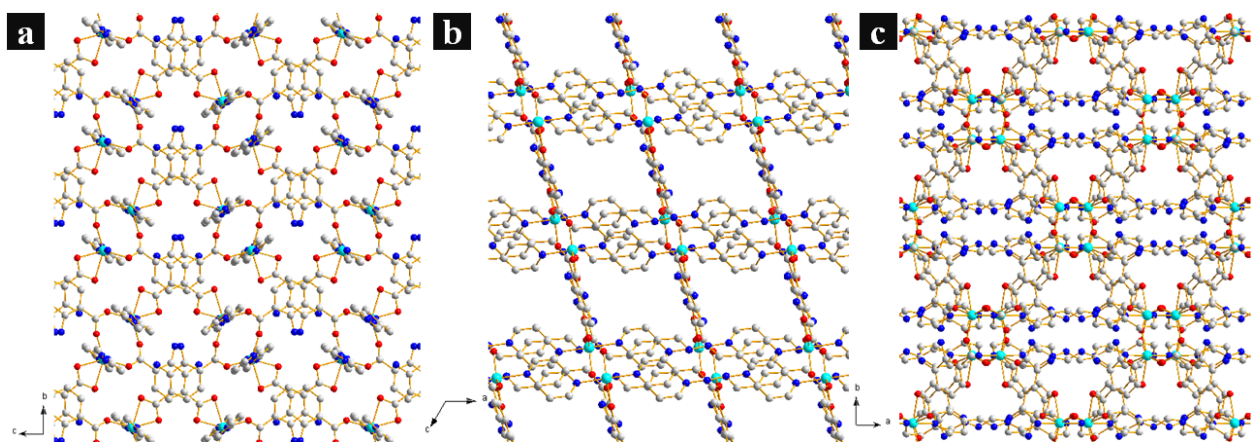

**Fig. S3** 3D two-fold interpenetrated **TMU-17-NH<sub>2</sub>**, viewed along (a) *a*, (b) *b* and (c) *c* axes. All hydrogen atoms and the disordered guest molecules in **TMU-17-NH<sub>2</sub>** are omitted for clarity.

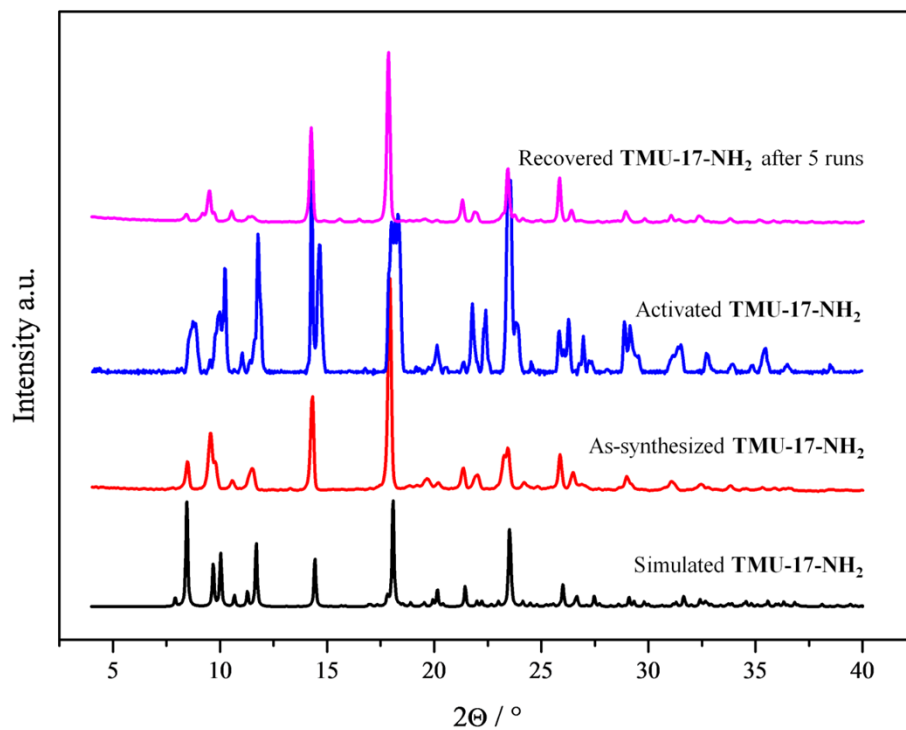

**Fig. S4** X-ray powder diffraction patterns of recovered TMU-17-NH<sub>2</sub> after five runs (purple); activated (blue); as-synthesized (red) and simulated (black) TMU-17-NH<sub>2</sub>.

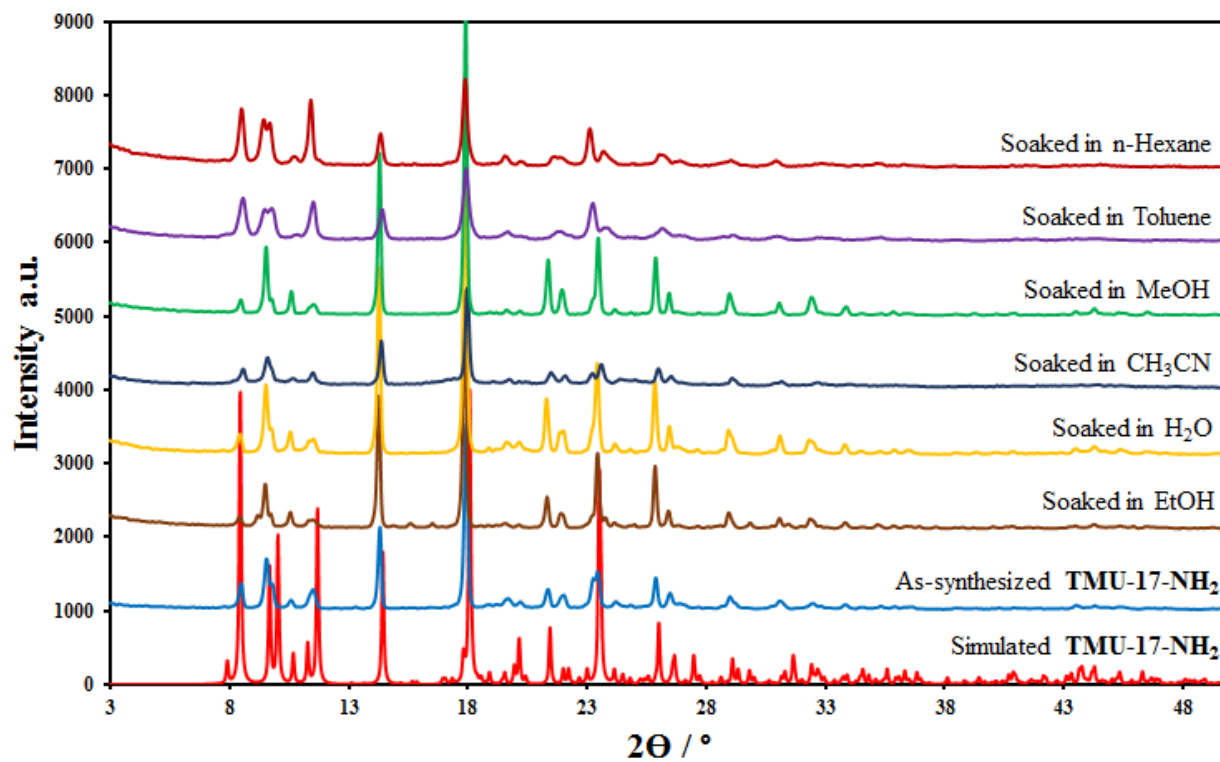

**Fig. S5** PXRD patterns of simulated (red) and as-synthesized (blue) TMU-17-NH<sub>2</sub>; and immersed TMU-17-NH<sub>2</sub> in solvents for 2 hours.

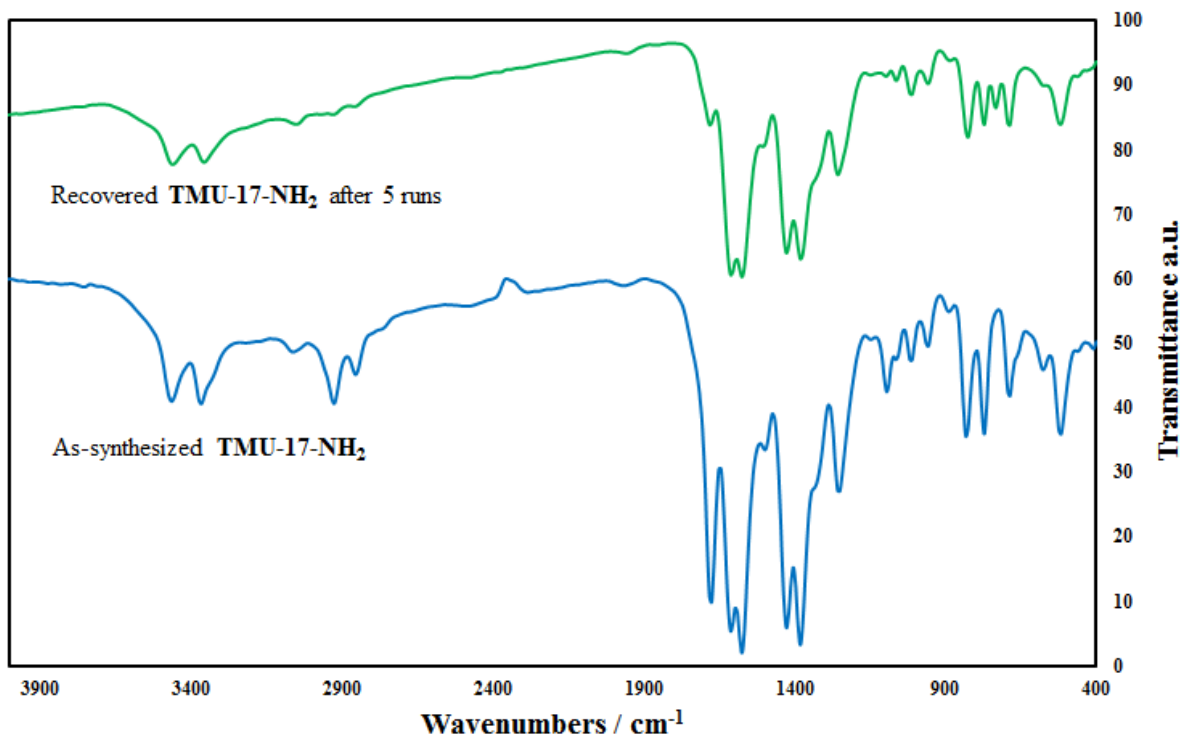

**Fig. S6** FT-IR spectra of recovered TMU-17-NH<sub>2</sub> after five runs (green) and as-synthesized TMU-17-NH<sub>2</sub> (blue).

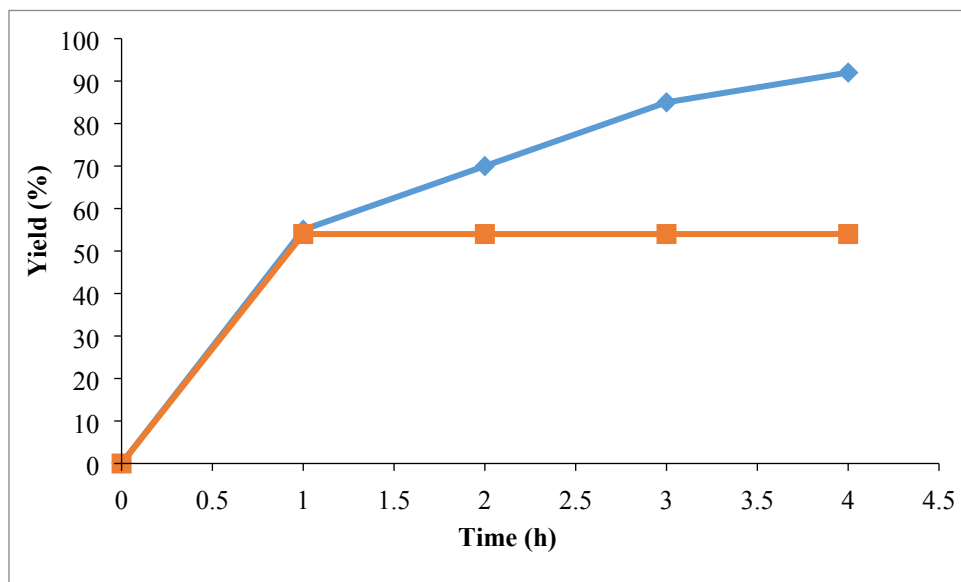

**Fig. S7.** Leaching test for TMU-17-NH<sub>2</sub>.

**Table S1** Preliminary crystallographic data for **TMU-17** in comparison with those of **TMU-17-NH<sub>2</sub>**.

| Entry    | MOF                    | Crystal System | <i>a</i> (Å) | <i>b</i> (Å) | <i>c</i> (Å) | β (deg) |
|----------|------------------------|----------------|--------------|--------------|--------------|---------|
| <b>1</b> | TMU-17-NH <sub>2</sub> | monoclinic     | 15.655       | 16.561       | 21.200       | 120.567 |
| <b>2</b> | TMU-17                 | monoclinic     | 15.939       | 16.354       | 21.511       | 122.001 |

**Table S2.** The reaction in the presence of **TMU-17-NH<sub>2</sub>** and **TMU-17**.

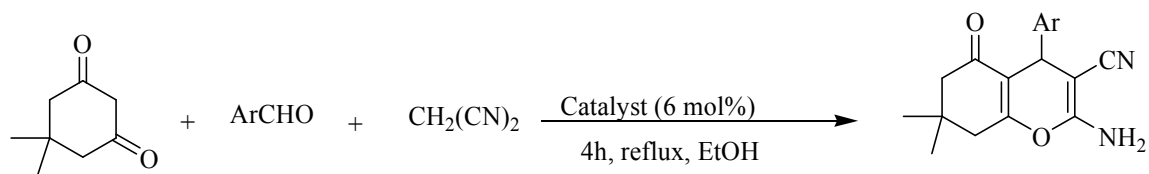

| Entry    | Catalyst               | Yield (%) |
|----------|------------------------|-----------|
| <b>1</b> | TMU-17                 | 43        |
| <b>2</b> | TMU-17-NH <sub>2</sub> | 92        |
| <b>3</b> | -                      | 0         |

**Table S3** Crystal data and structure refinements for compound **TMU-17-NH<sub>2</sub>**.

| Identification code                                      | TMU-17-NH <sub>2</sub>                                           |
|----------------------------------------------------------|------------------------------------------------------------------|
| Chemical formula                                         | C <sub>23</sub> H <sub>22</sub> N <sub>6</sub> O <sub>5</sub> Zn |
| formula mass                                             | 527.84                                                           |
| <i>T</i> (K)                                             | 180(2)                                                           |
| Crystal syst                                             | Monoclinic                                                       |
| Space group                                              | <i>C</i> <sub>2</sub> / <i>c</i>                                 |
| <i>a</i> (Å)                                             | 15.655(3)                                                        |
| <i>b</i> (Å)                                             | 16.561(3)                                                        |
| <i>c</i> (Å)                                             | 21.200(3)                                                        |
| β (deg)                                                  | 120.567(9)                                                       |
| <i>V</i> (Å <sup>3</sup> )                               | 4732.6(14)                                                       |
| <i>Z</i>                                                 | 8                                                                |
| μ <sub>calcd.</sub> (g/m <sup>3</sup> )                  | 1.085                                                            |
| F(000)                                                   | 2176                                                             |
| Reflections collected                                    | 4534 / 2844                                                      |
| R(int)                                                   | 0.0855                                                           |
| Goodness-of-fit on <i>F</i> <sup>2</sup>                 | 1.083                                                            |
| R <sub>1</sub> <sup>a</sup> [ <i>I</i> > 2σ( <i>I</i> )] | 0.0805                                                           |
| wR <sub>2</sub> <sup>b</sup>                             | 0.1589                                                           |

$${}^a R_1 = \frac{\sum ||F_o| - |F_c||}{\sum |F_o|}, \quad {}^b wR_2 = \frac{|\sum w(|F_o|^2 - |F_c|^2)|}{\sum w(F_o^2)^2}^{1/2}$$
